# Supplementary material for: Prevalence and Associated Factors of Femoral Shaft Fractures Among Patients With Extremity Fractures at AaBET Hospital, Addis Ababa, Ethiopia, 2023–2024
Source: Research Square preprint supplement (doi:10.21203/rs.3.rs-7367615/v1), 2025-09-03

Selected radiographs from patients included in the study are presented below.


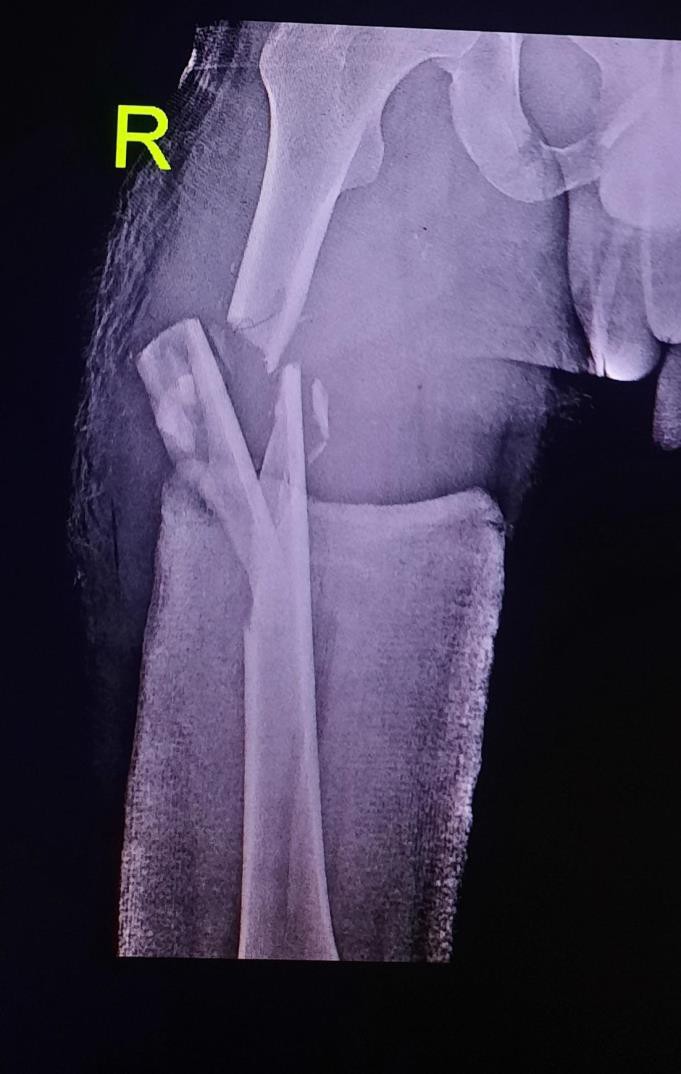

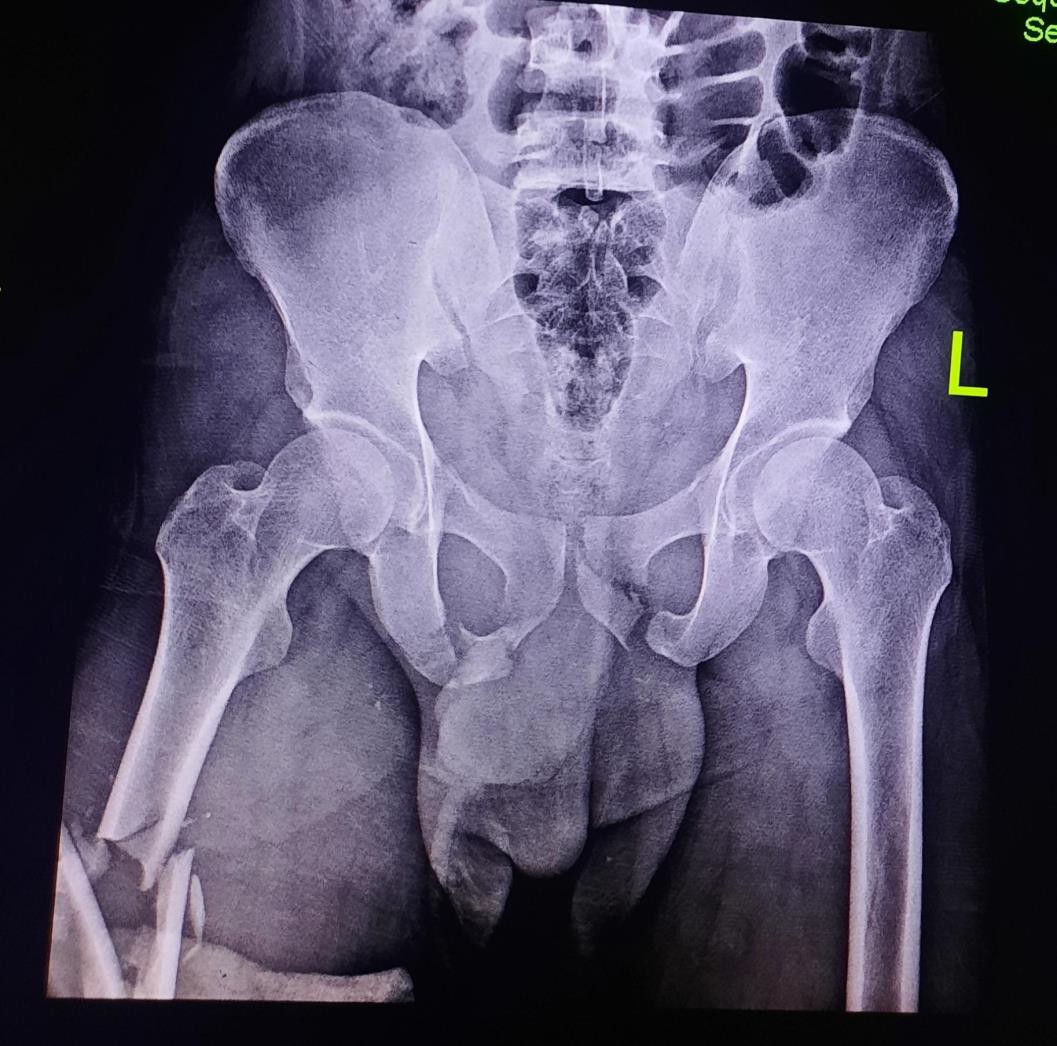
25-year-old male
• Road traffic accident of 14 hours duration

43-year-old male

- -
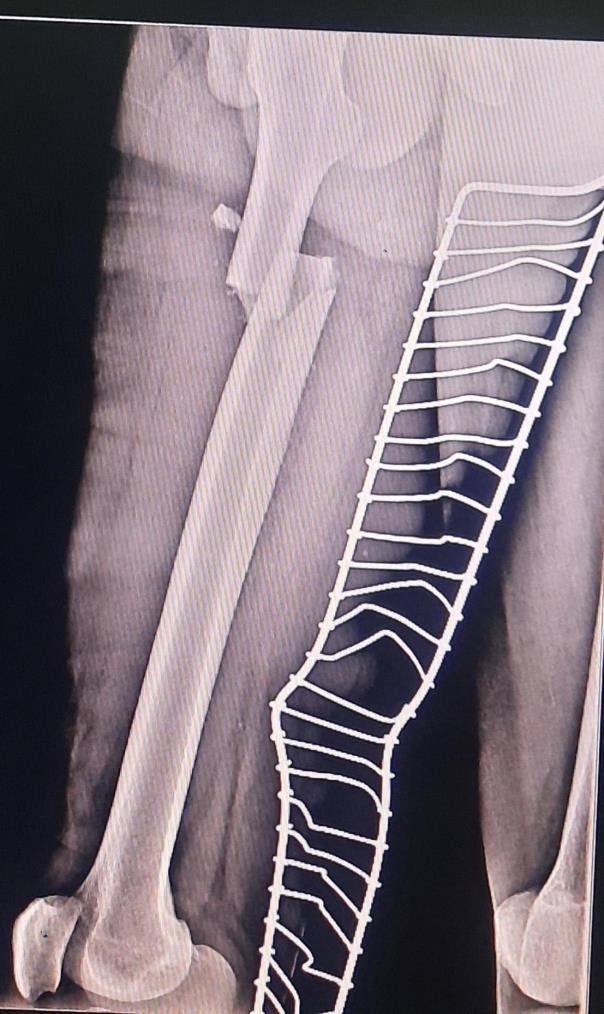
Fall down accident and wall collapsed on him

19-year-old male – Road traffic accident


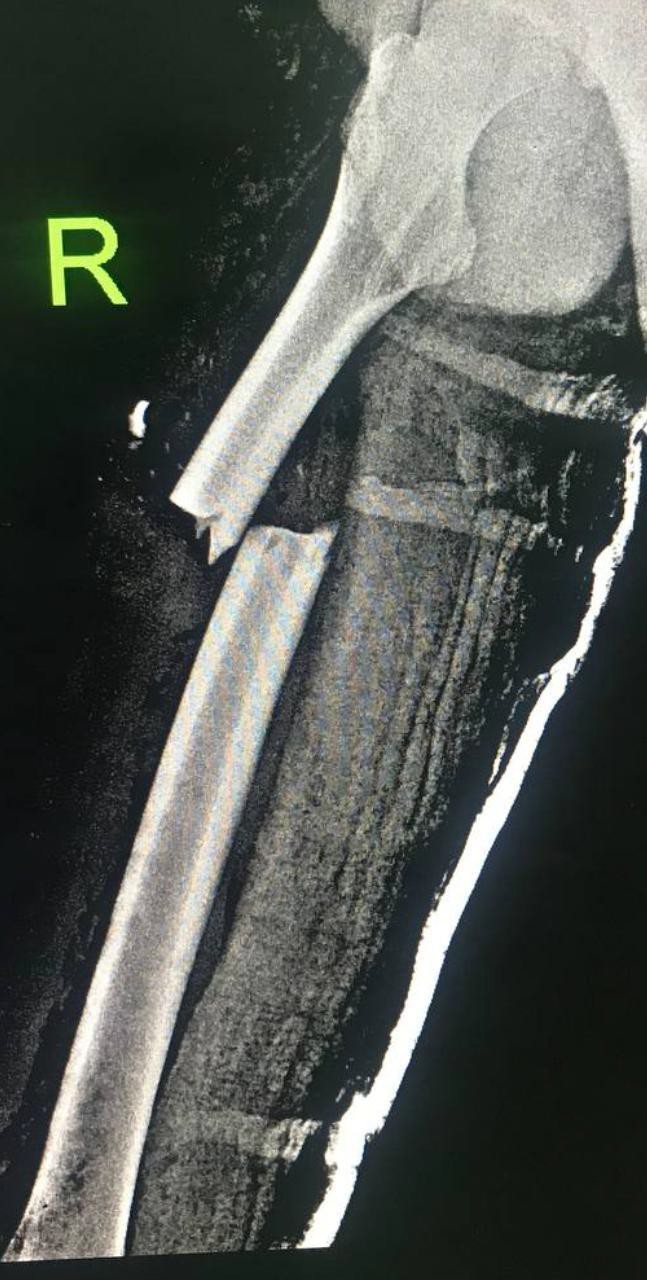

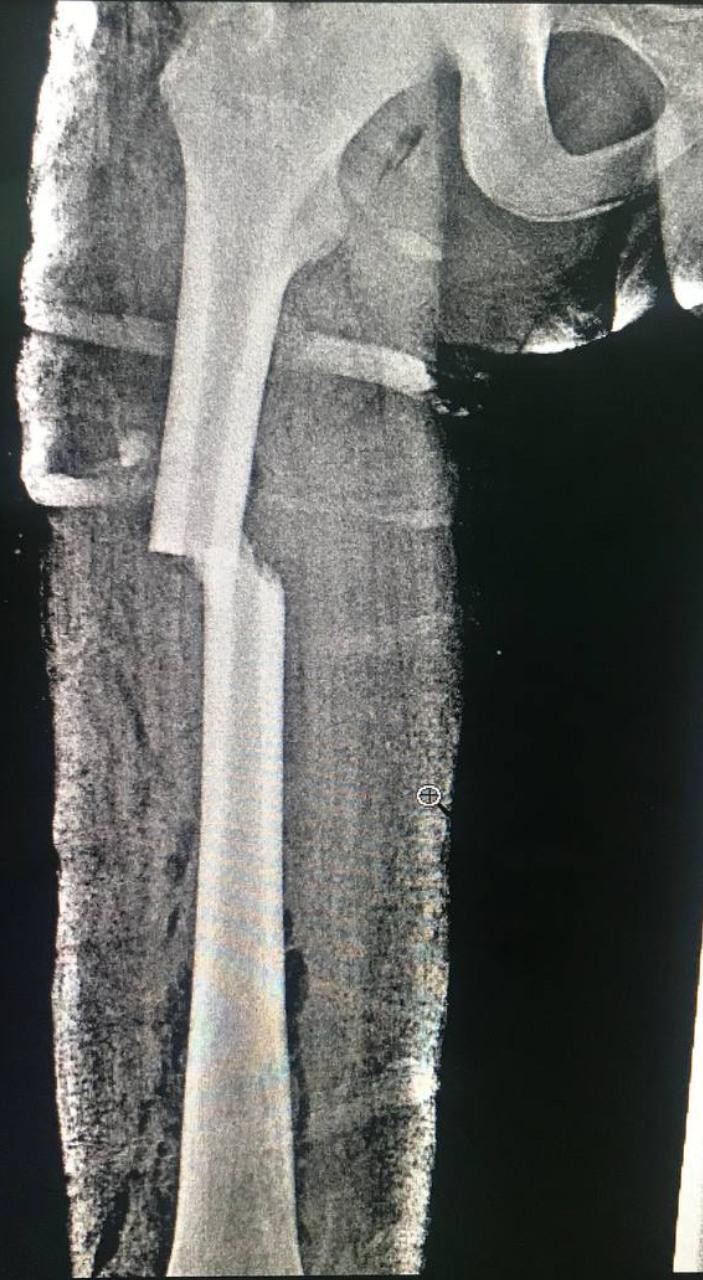


Falling down accident – 45-year-old male


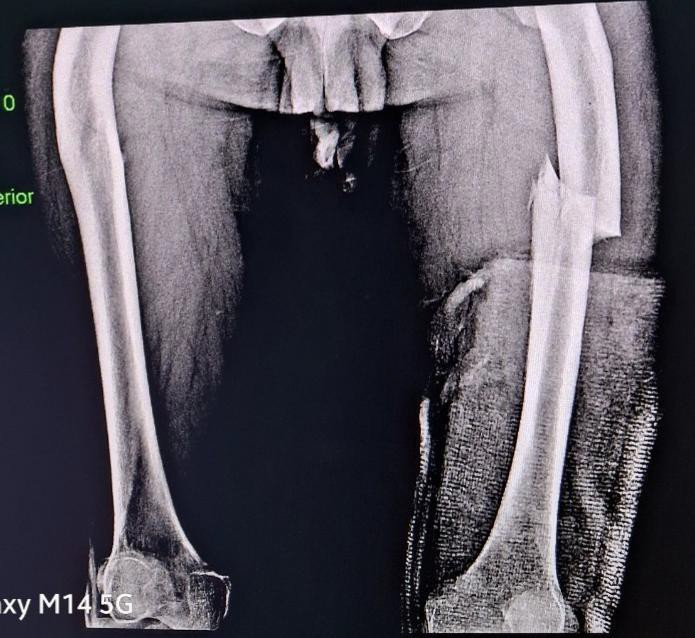

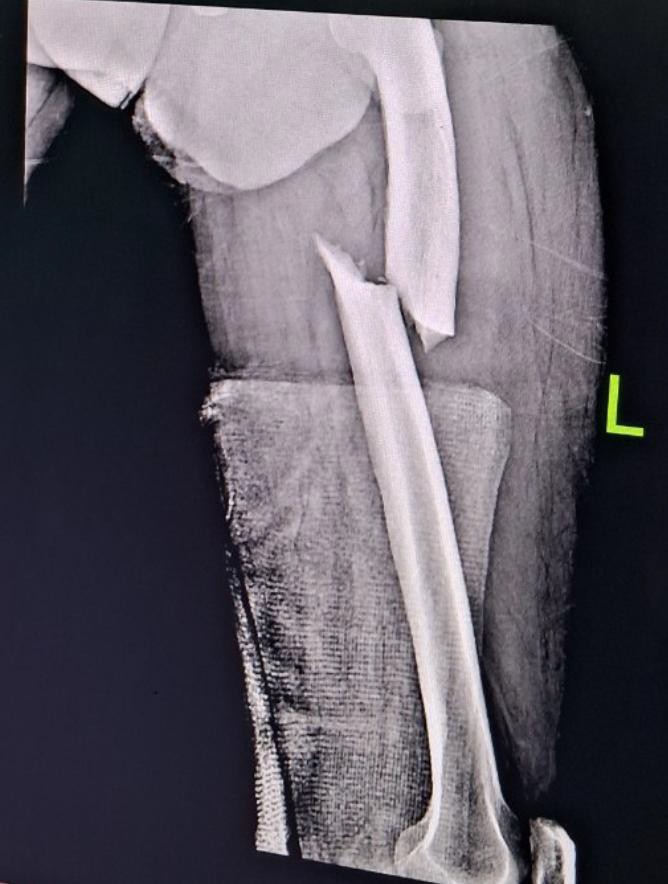


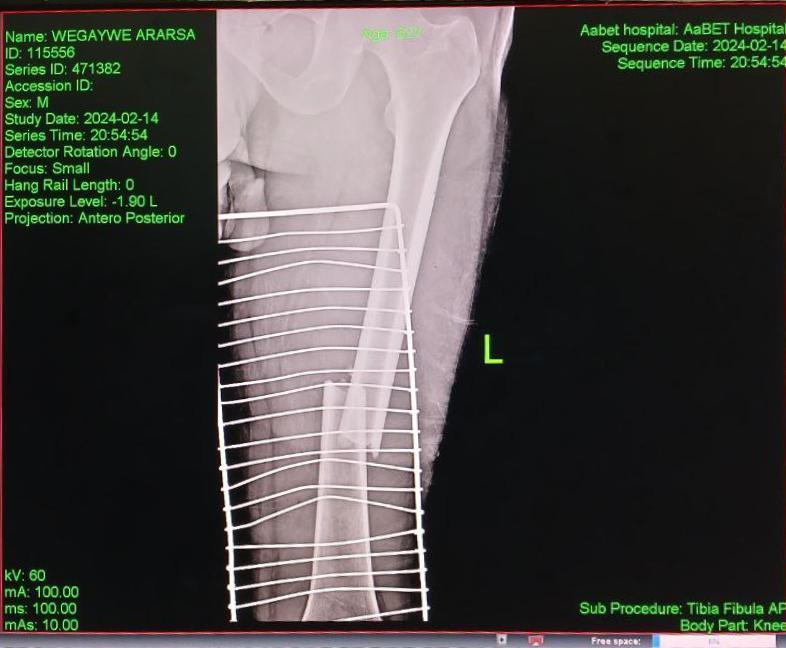
62-year-old male – Falling debris accident

70-year-old female – Road traffic accident


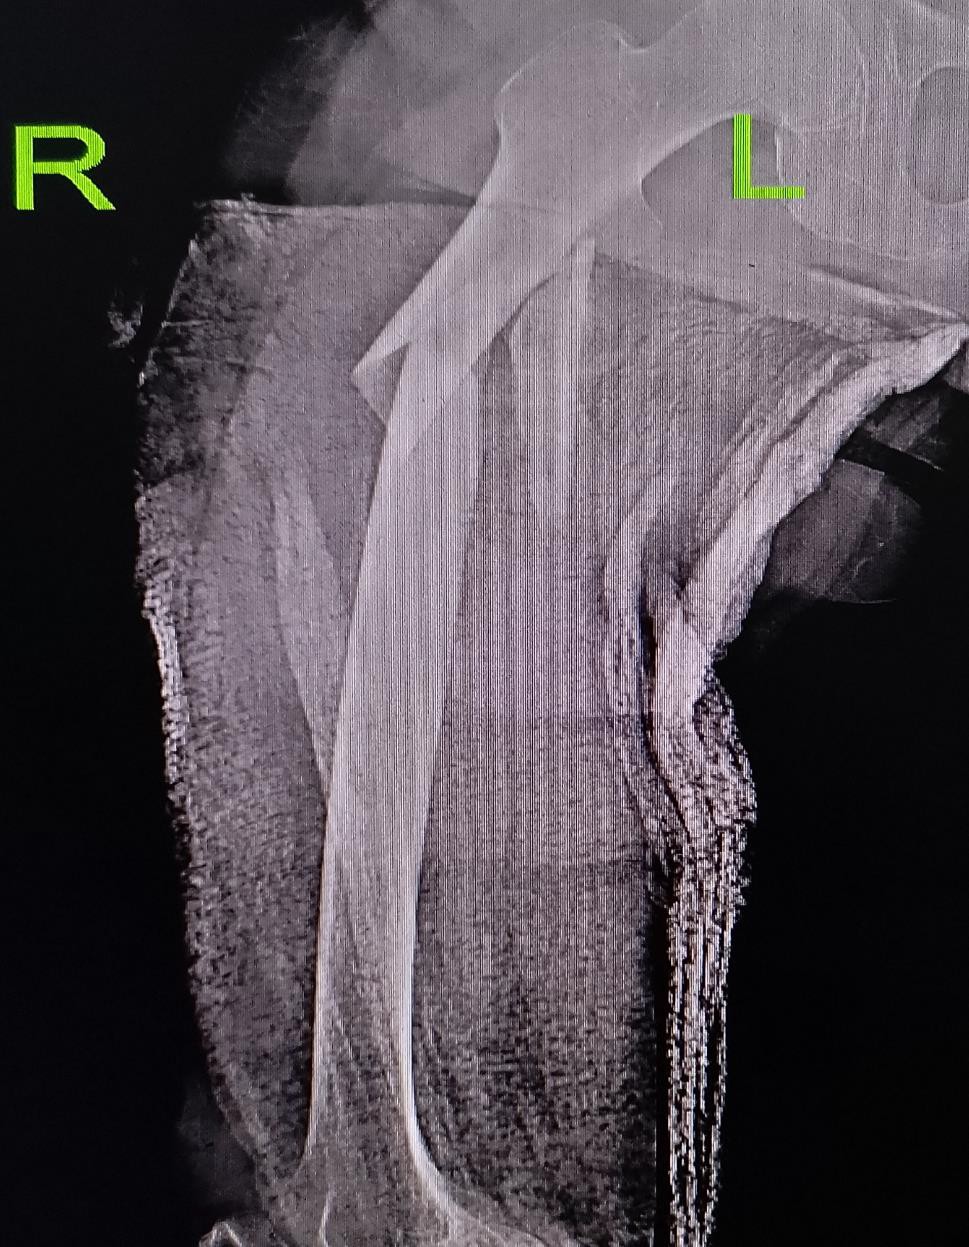

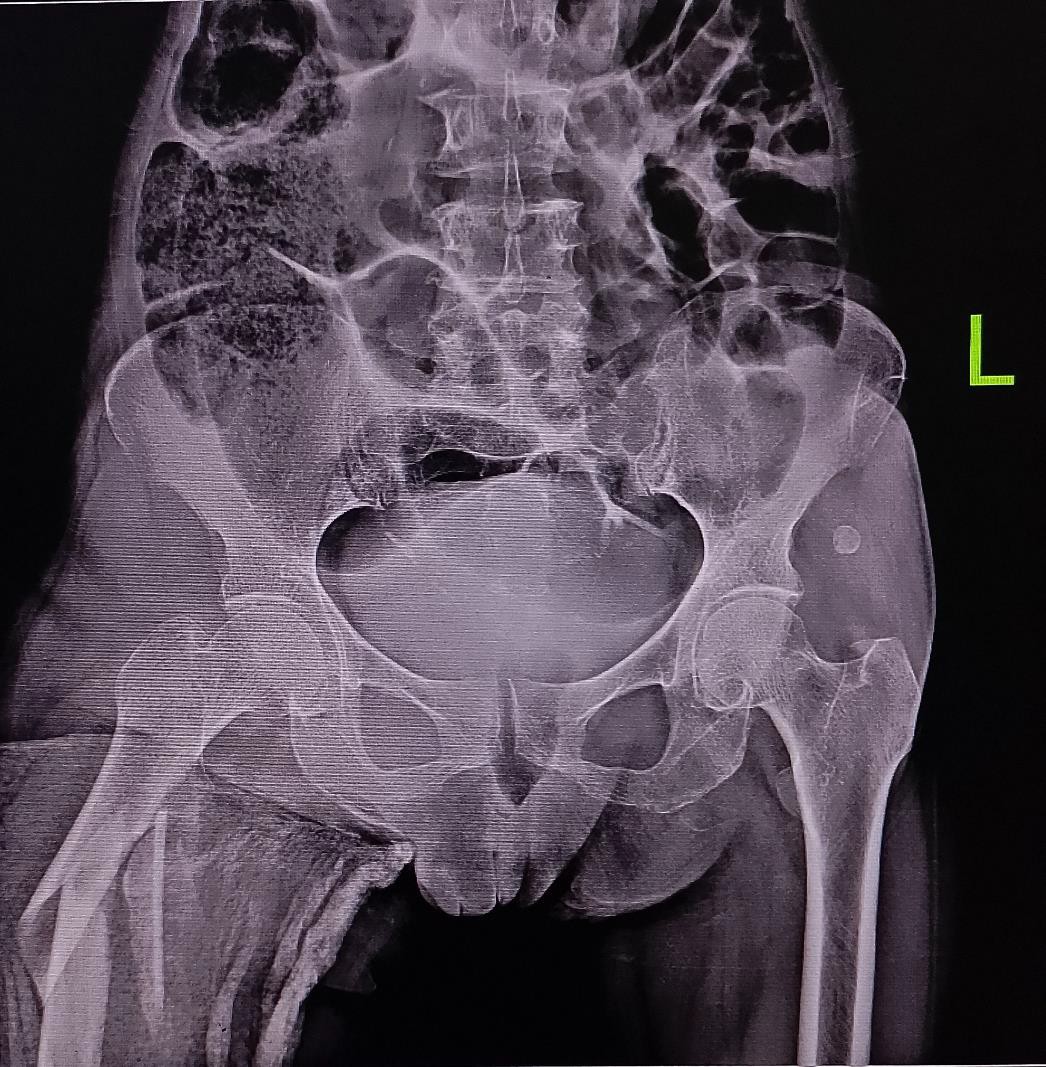


76-year-old male – Motor vehicle accident


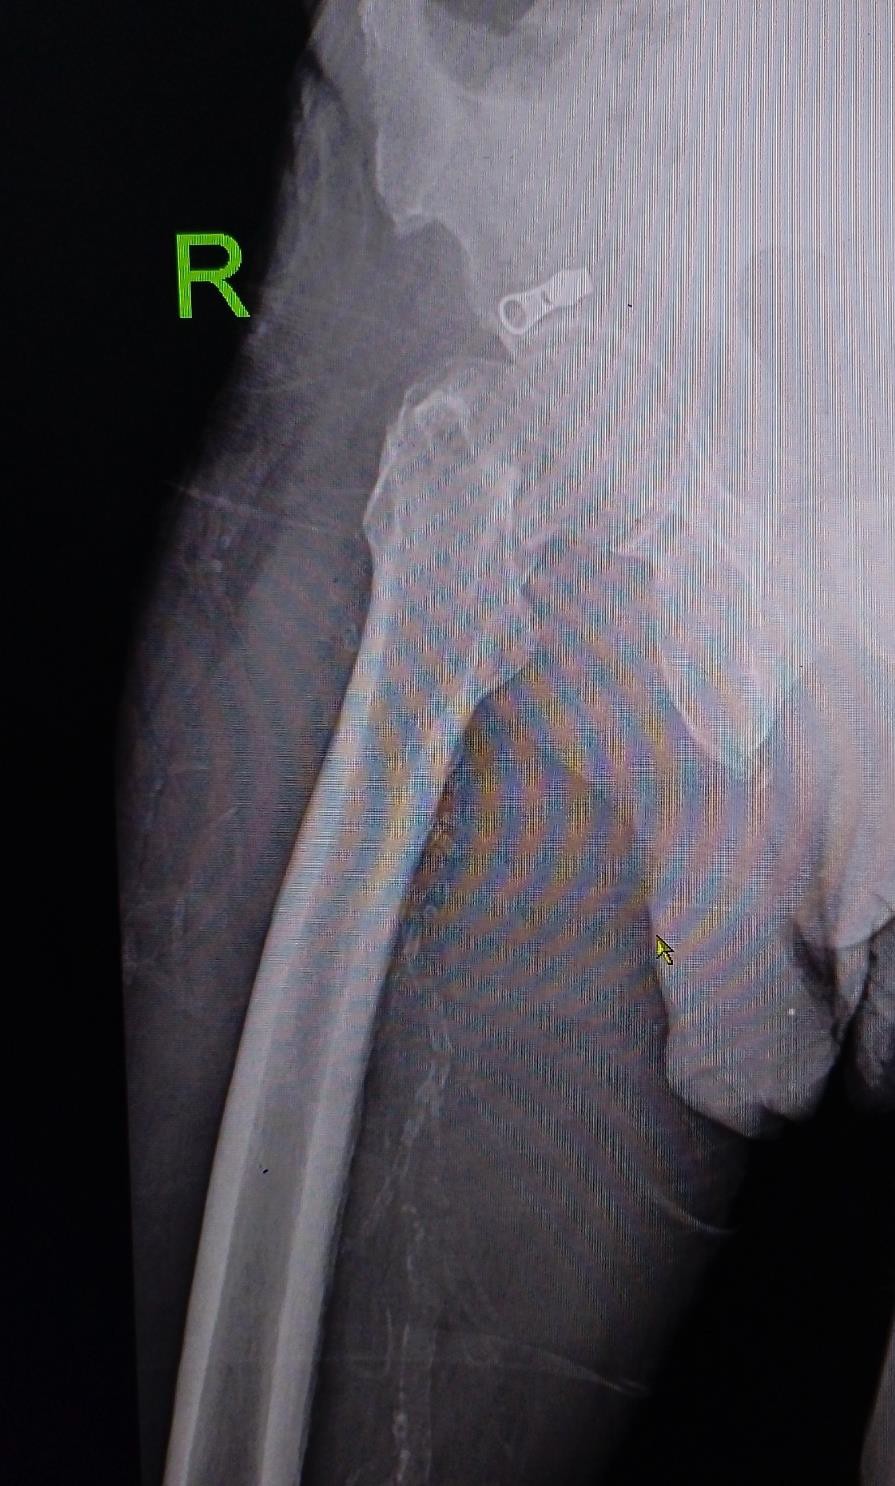

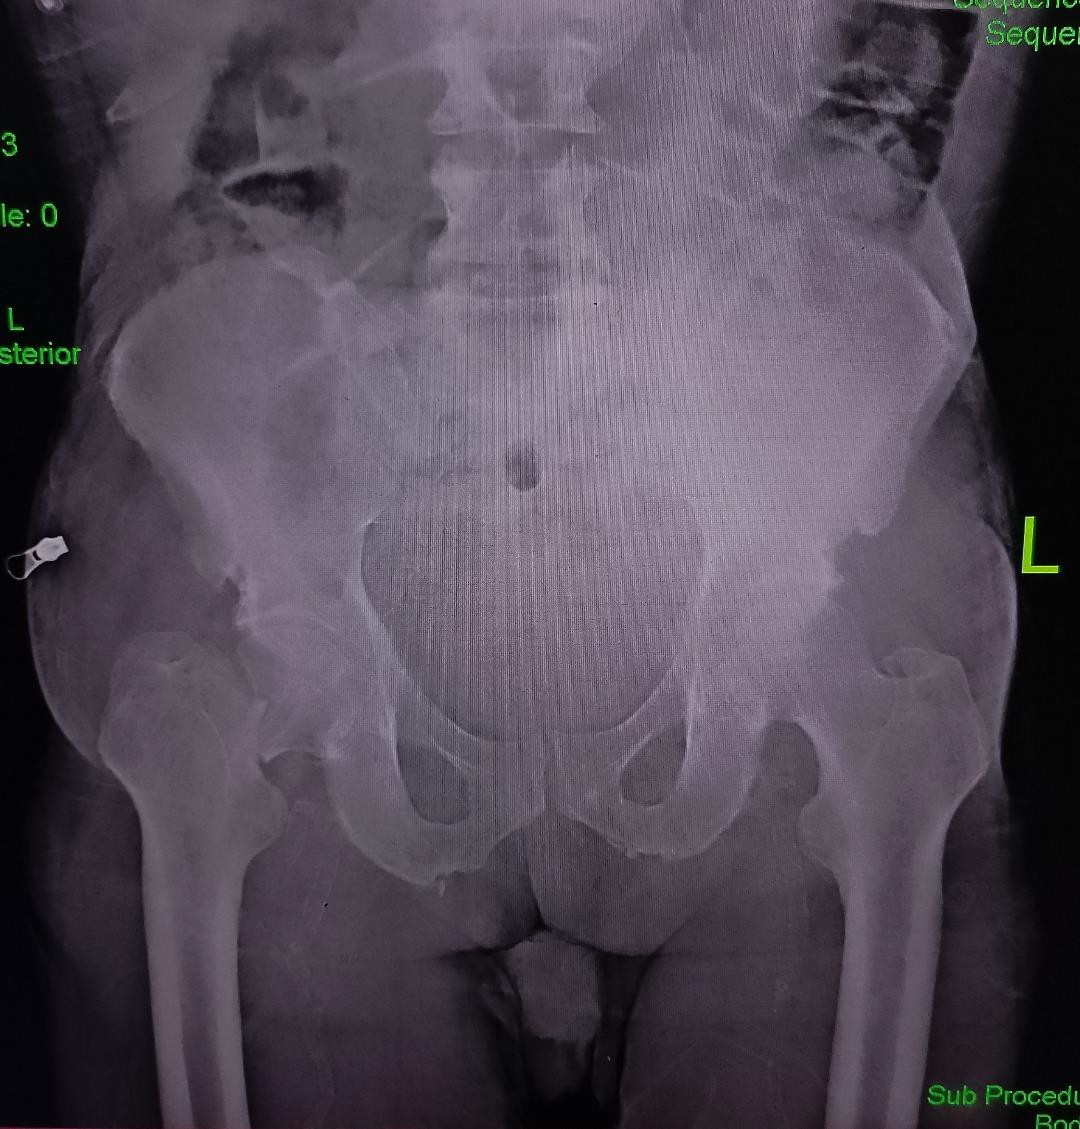


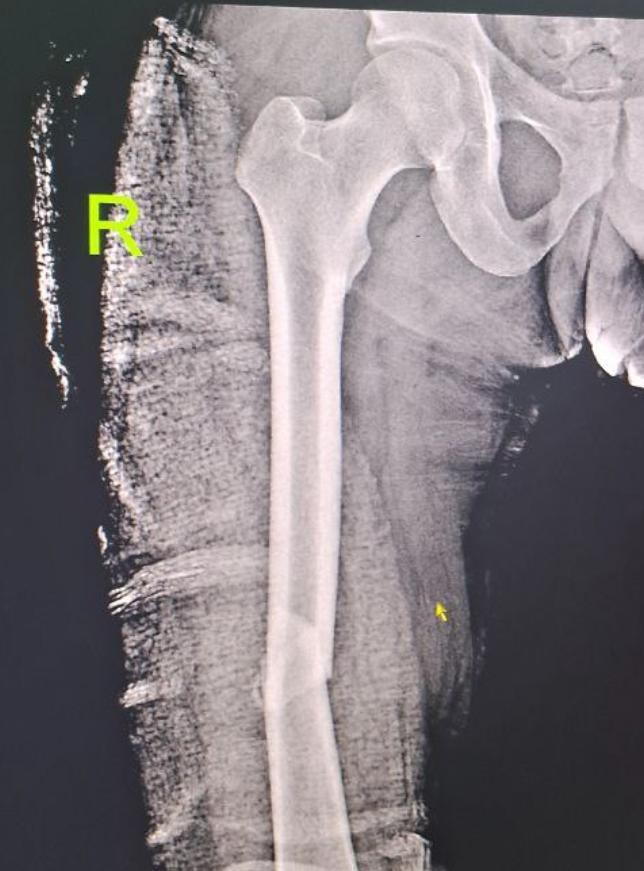

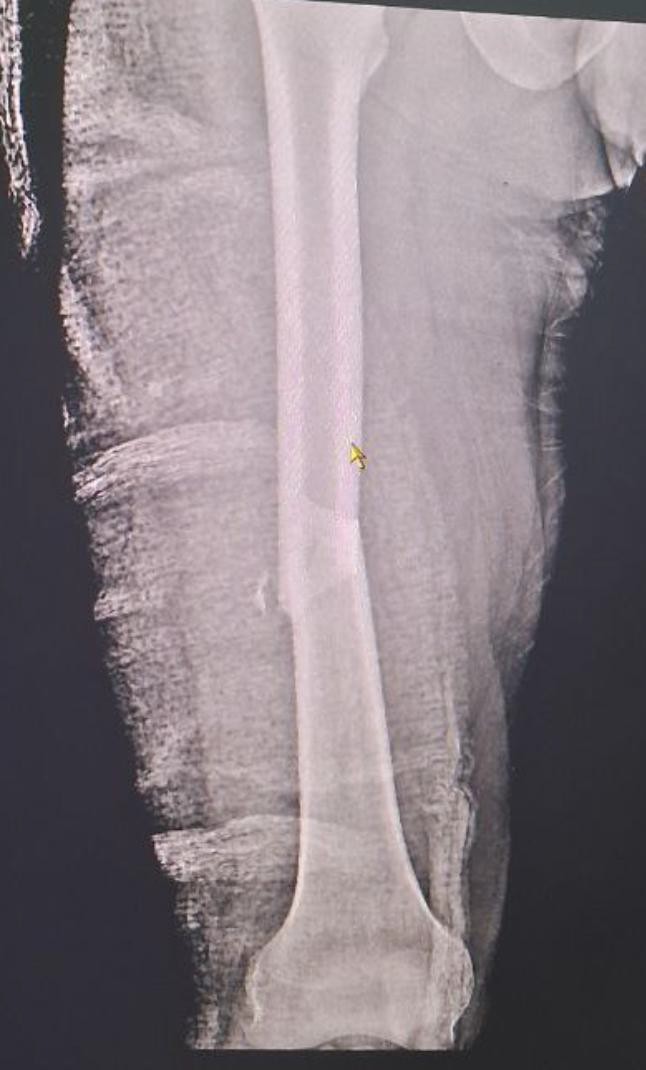

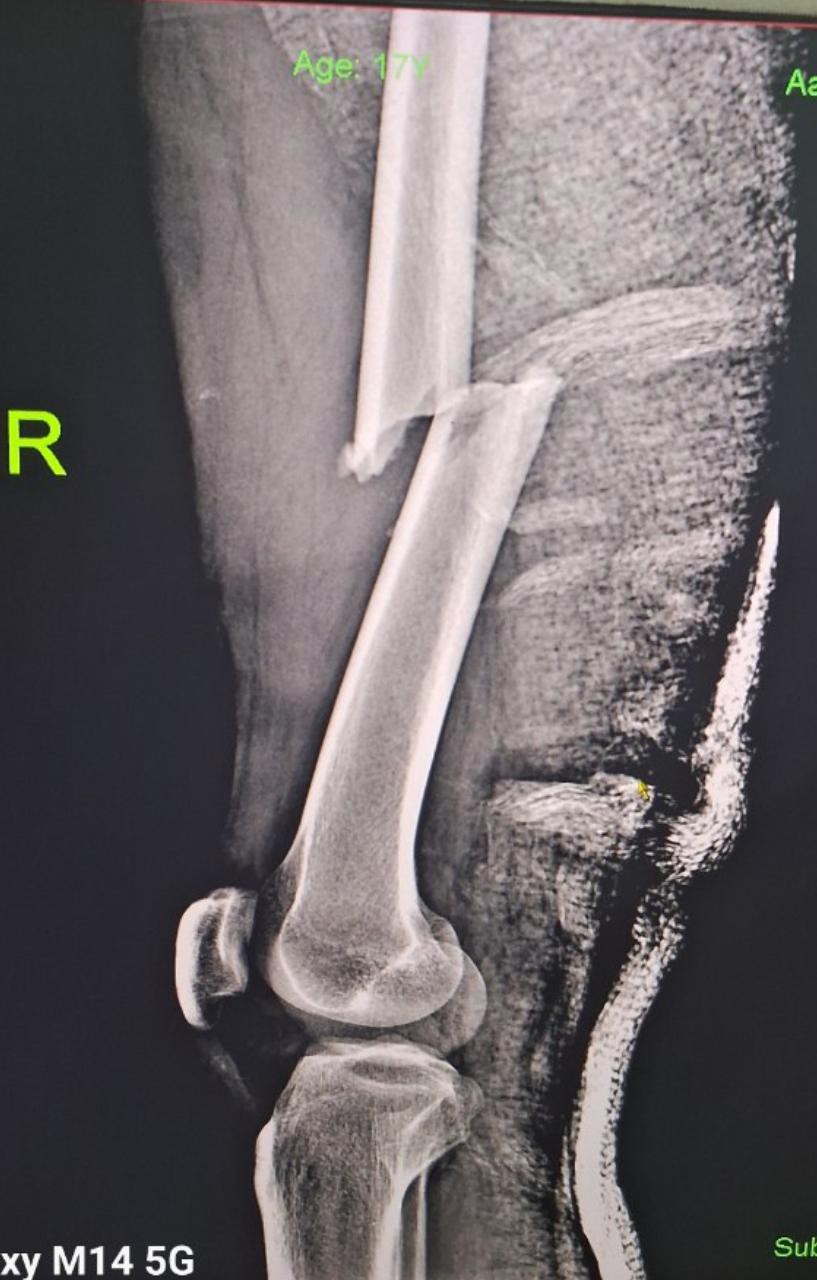
 24-year-old male Road traffic accident 6 days ago


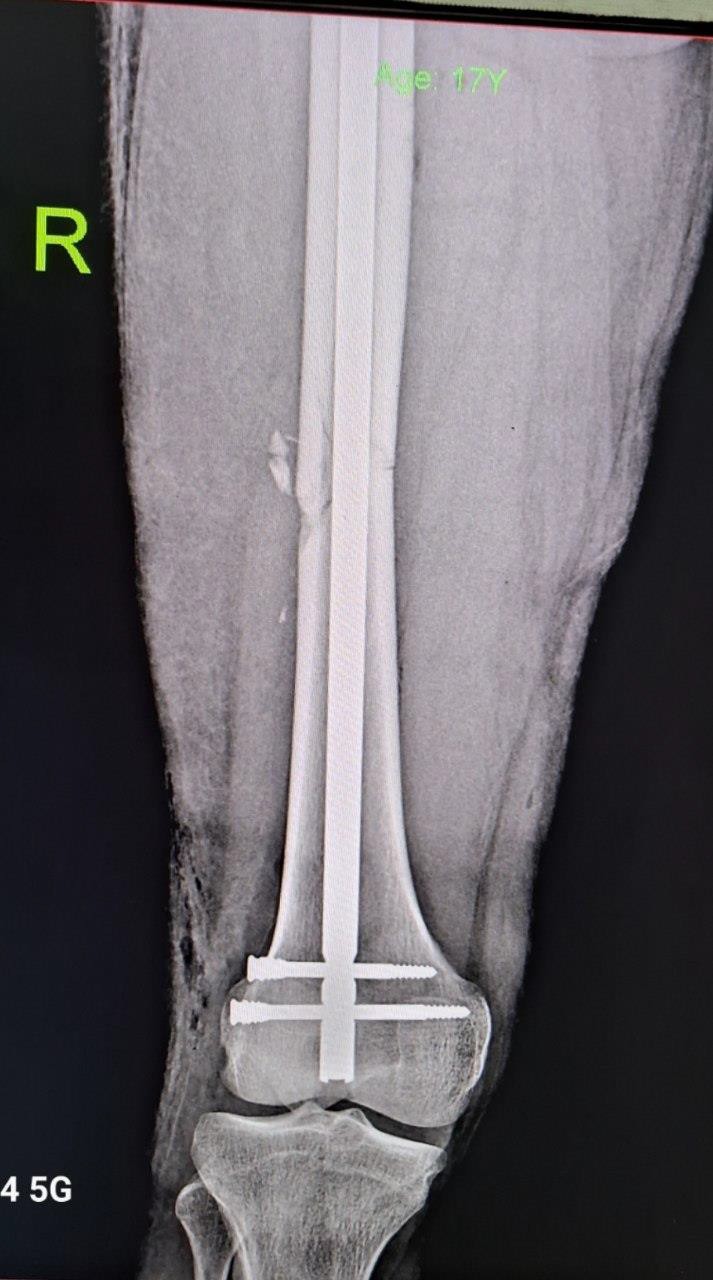

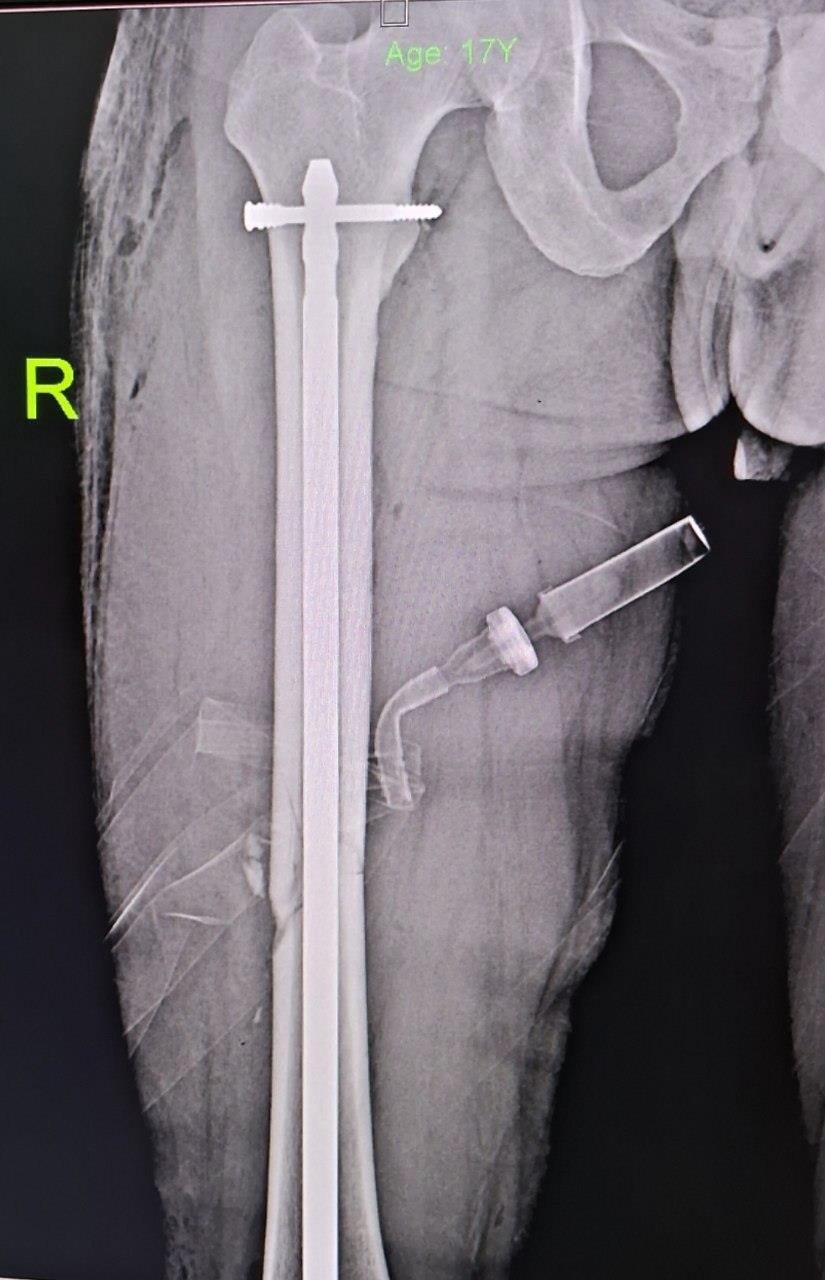


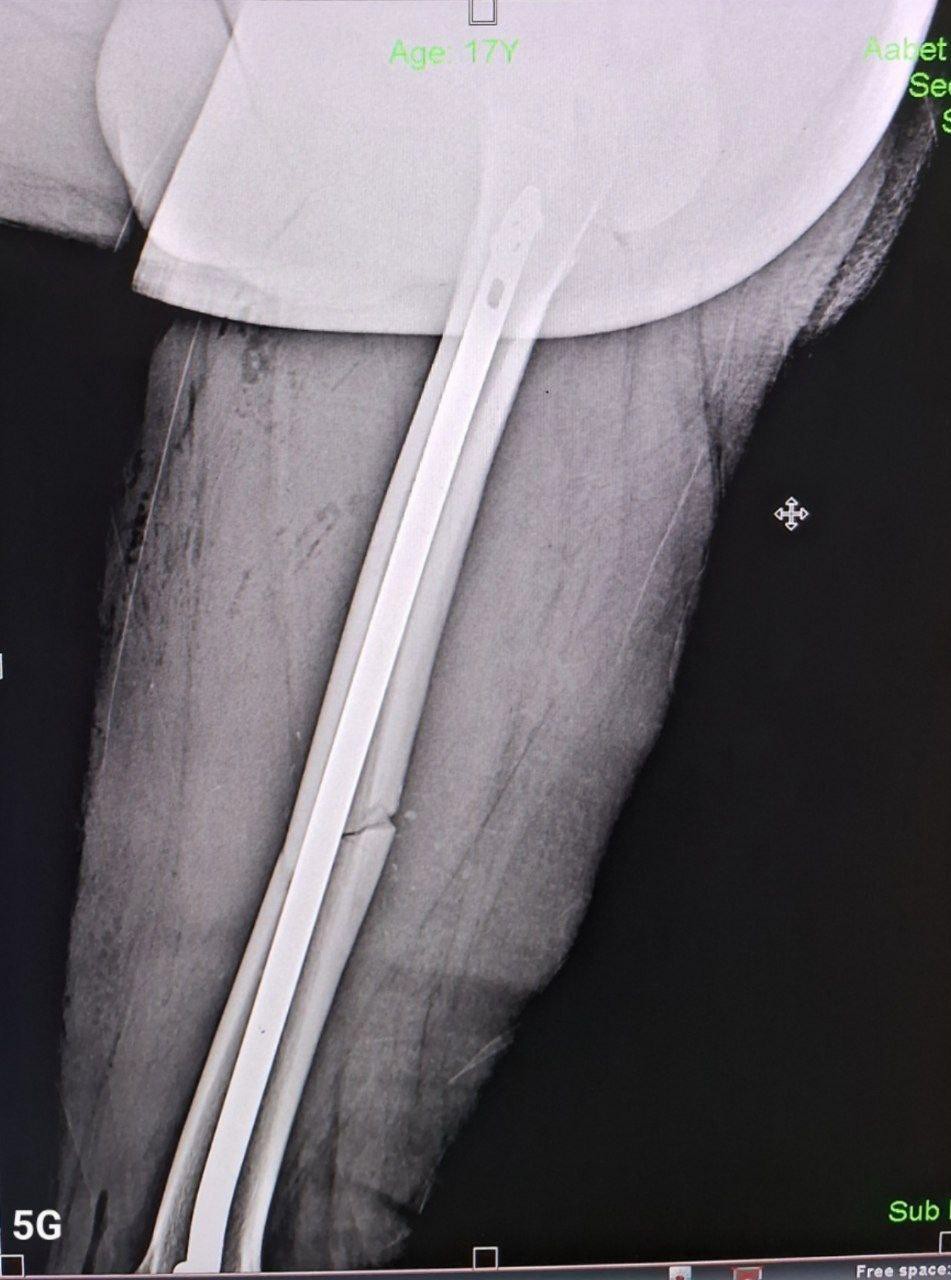

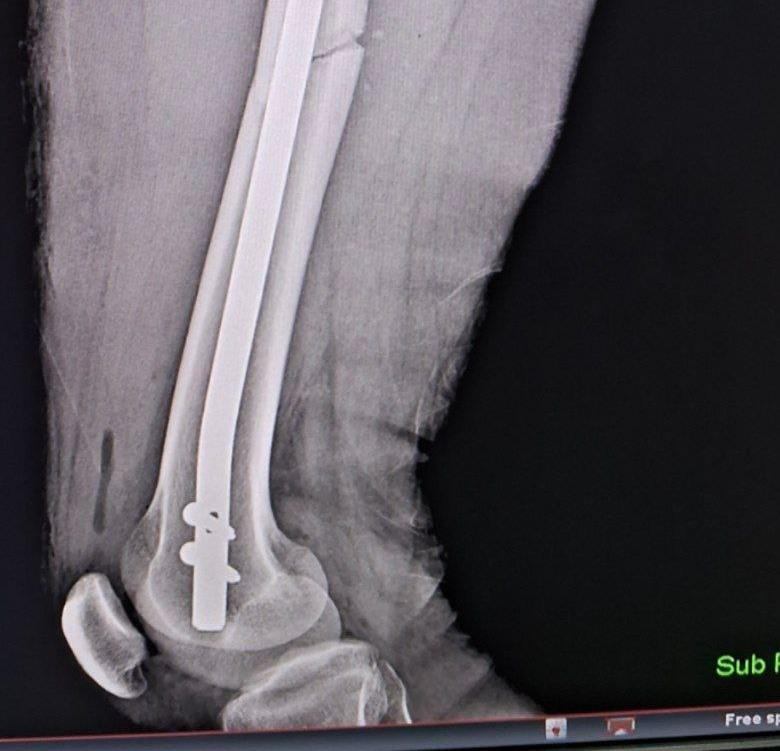


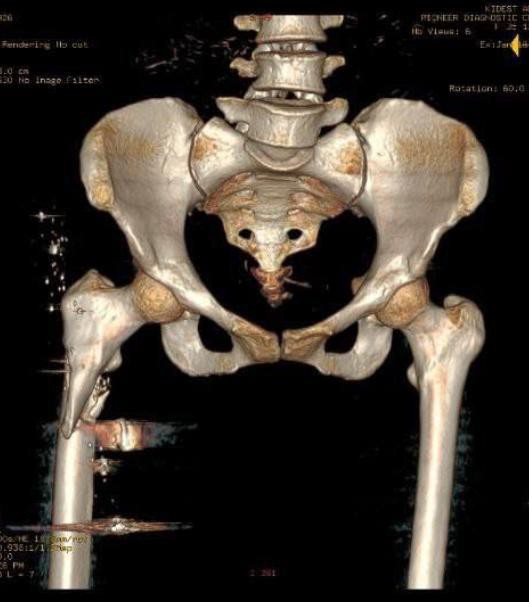

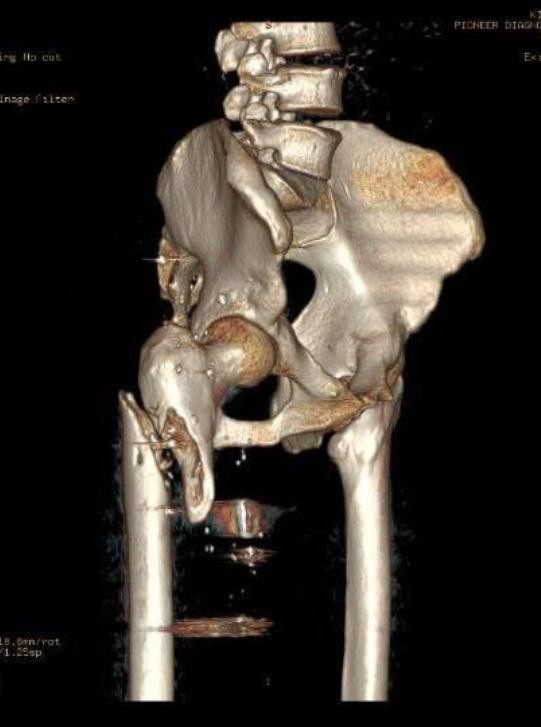

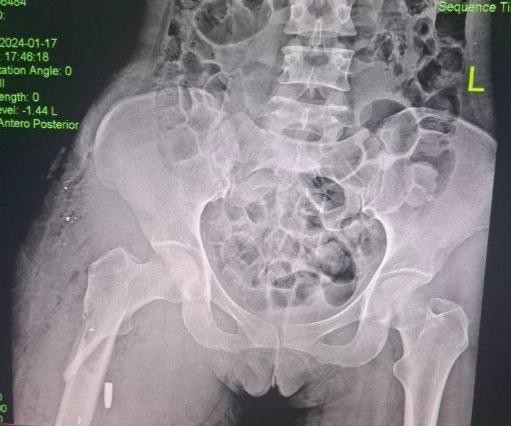

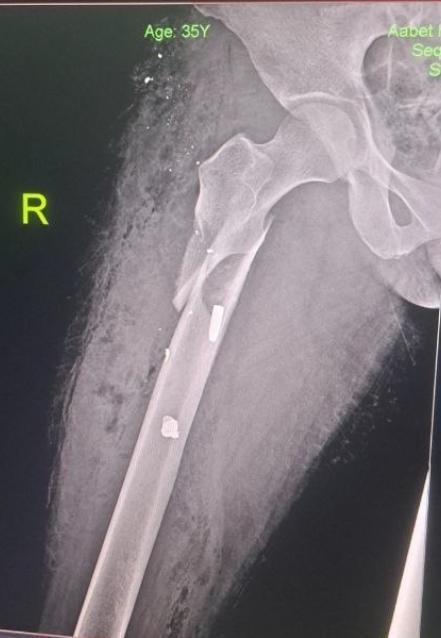
 35-year-old female Mechanism of injury – Bullet injury / 4 weeks ago

- 28-year-old male
  • Mechanism of injury – Motor vehicle accident / 1 day ago


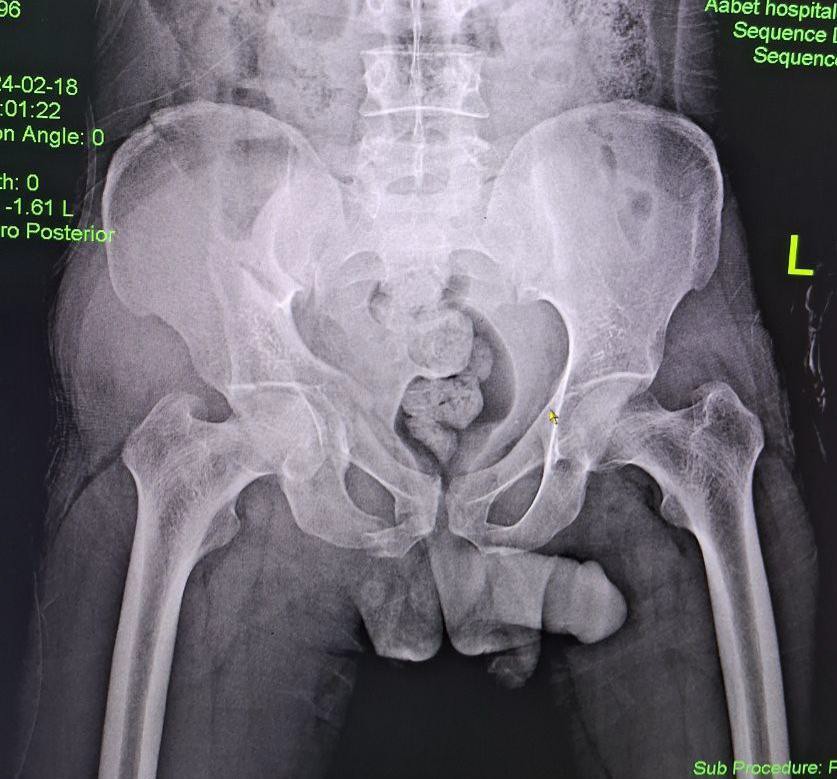

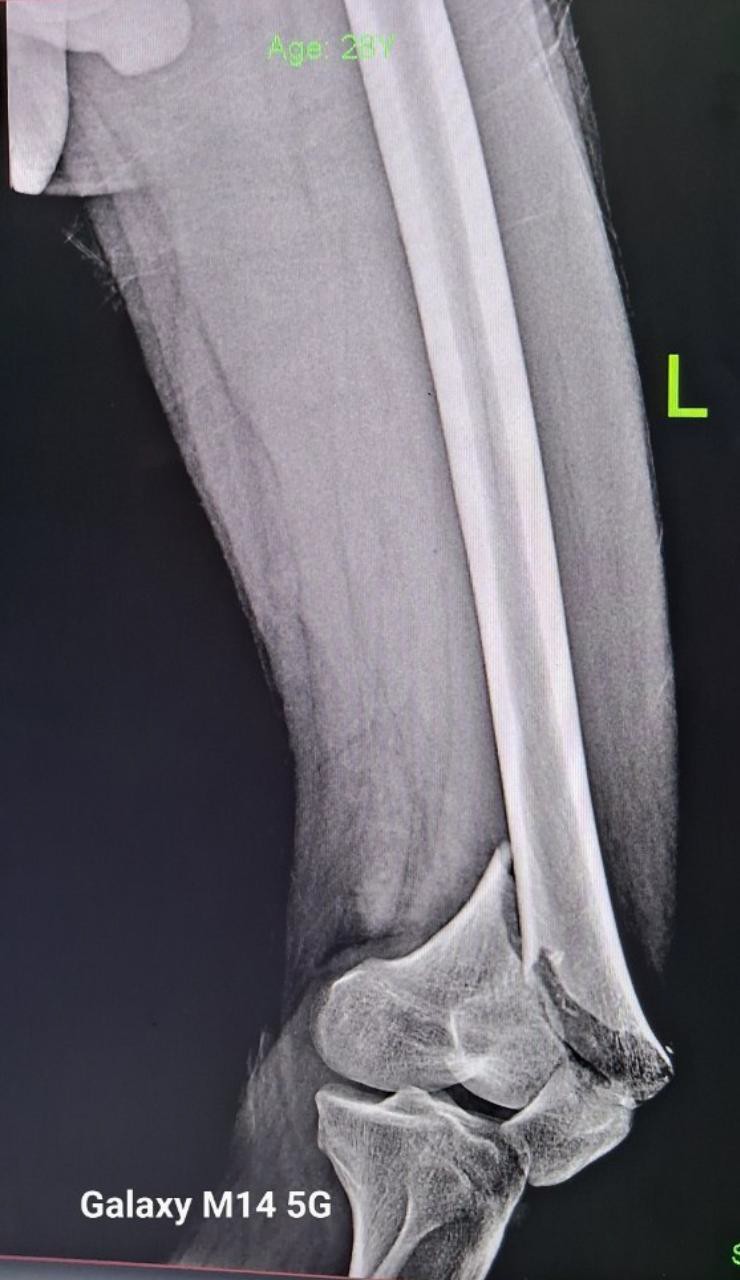

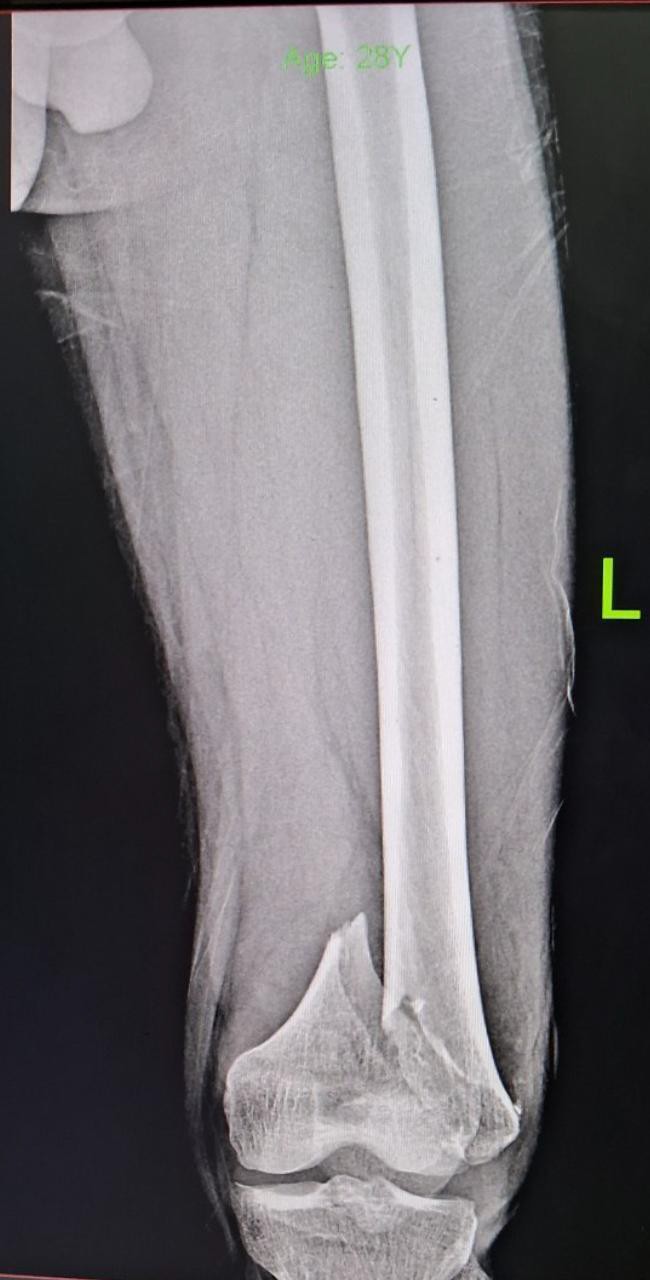


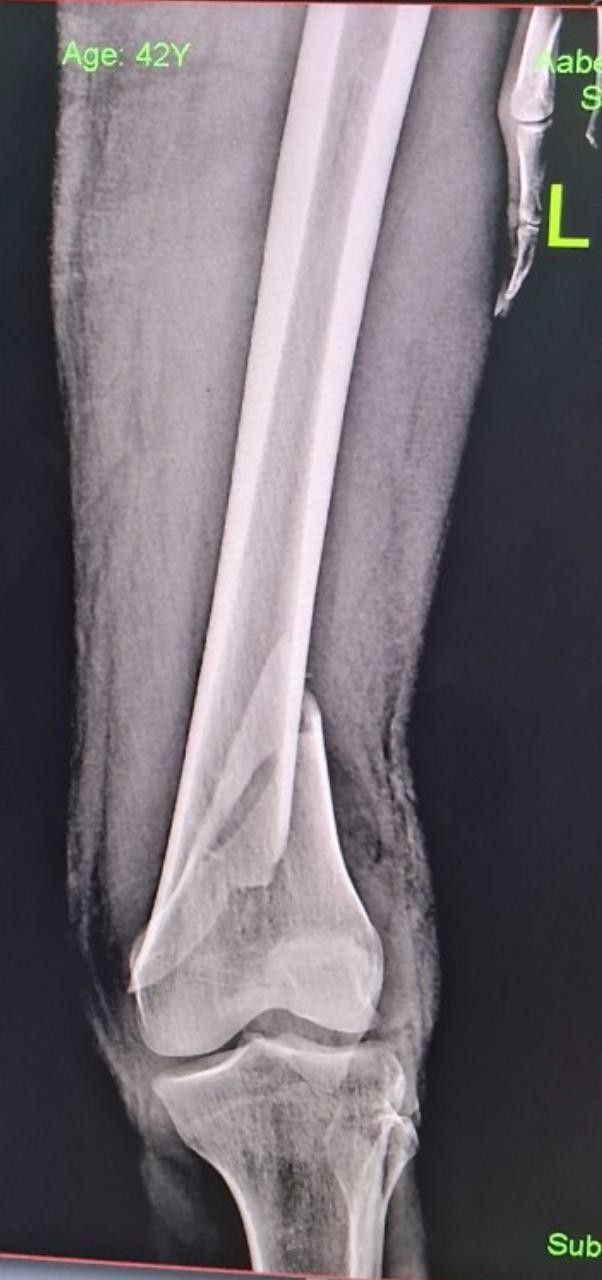

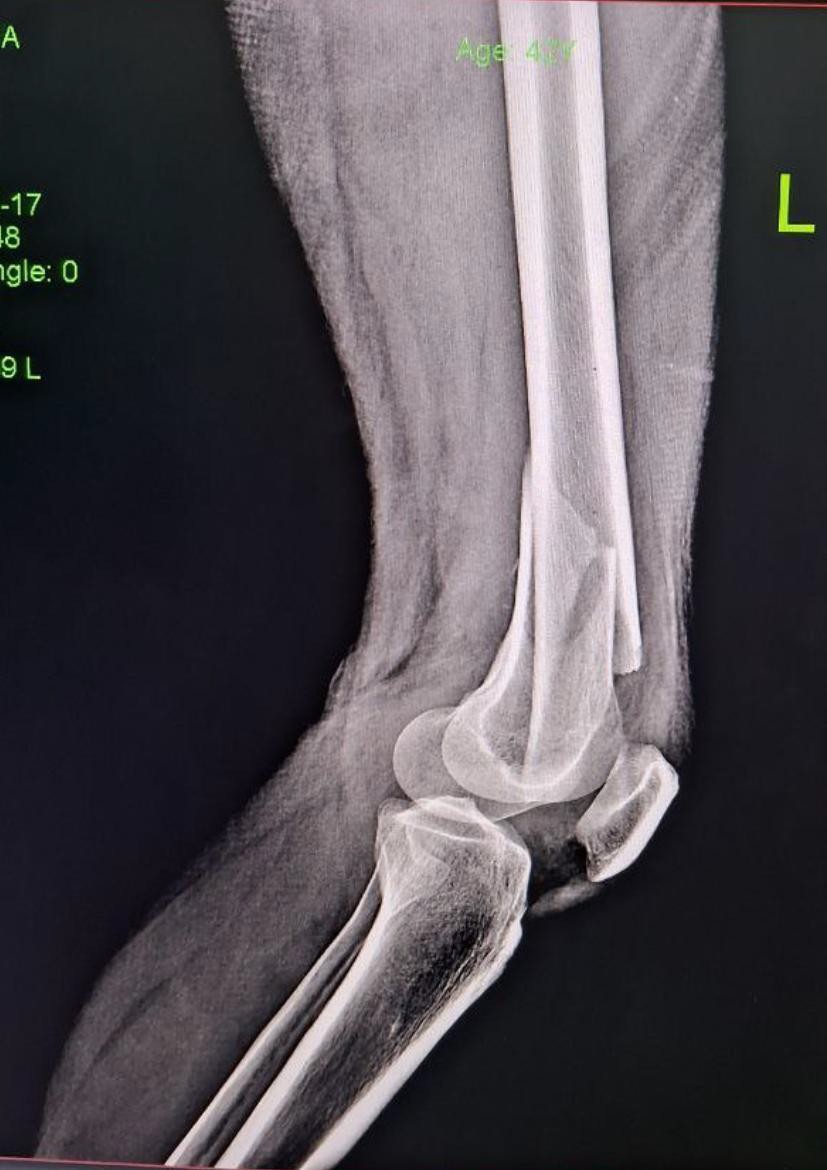
42-year-old male, 115634
• Mechanism of injury – Stick injury / 2 hours ago

32-year-old male – Falling debris accident


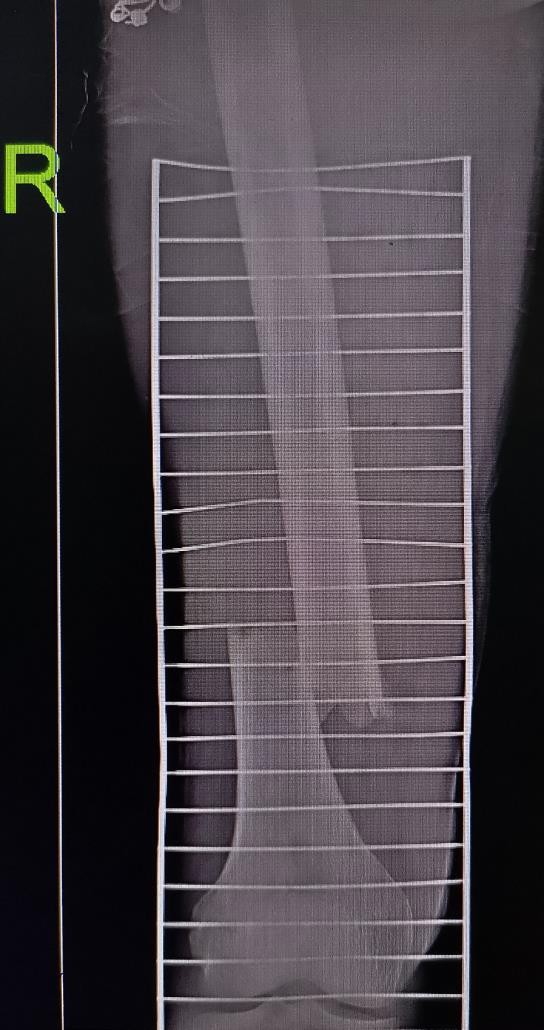

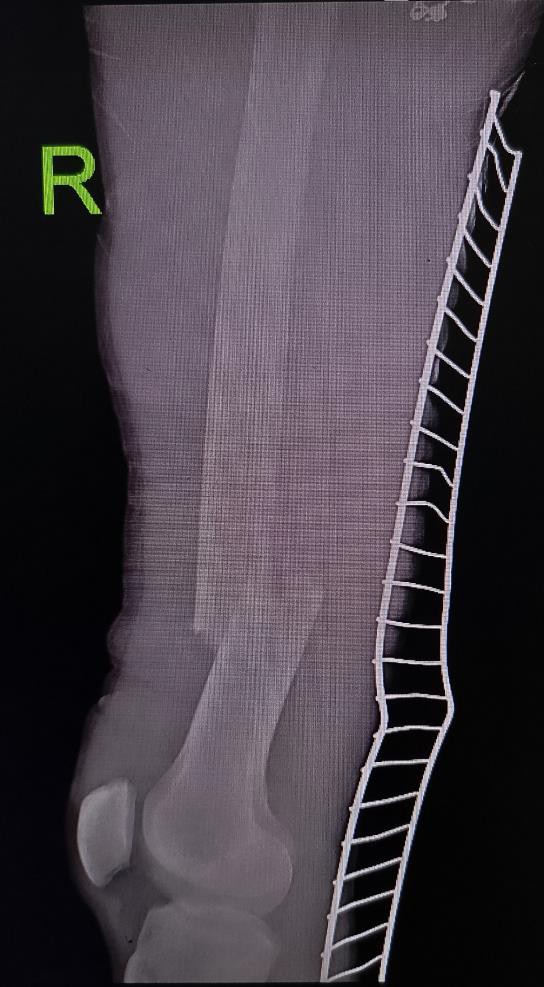

Supplement: Supplementary file 1 [file a92b70f63194d97bfaa5bff4.docx]
